# Supplementary material for: Pattern Recognition Techniques Applied to the Study of Leishmanial Glyceraldehyde-3-Phosphate Dehydrogenase Inhibition
Source: PubMed Central journal article supplement (PMC3958905; doi:10.3390/ijms15023186), 2014-02-21
Supplement: ijms-15-03186-s001.pdf [file ijms-15-03186-s001.pdf]

## Supplementary Information

**Table S1.** Calculated values of the selected variables for training and test sets.

| <b>Compound</b>     | <b>E<sub>LUMO</sub> (a.u.)</b> | <b>QR<sup>2</sup></b> | <b>QR<sup>4</sup></b> | <b>Volume (Å<sup>3</sup>)</b> | <b>Polarizability (Å<sup>3</sup>)</b> |
|---------------------|--------------------------------|-----------------------|-----------------------|-------------------------------|---------------------------------------|
| <i>Training set</i> |                                |                       |                       |                               |                                       |
| 1                   | -0.05                          | -0.58                 | -0.47                 | 1475.95                       | 57.74                                 |
| 2                   | -0.05                          | -0.50                 | -0.52                 | 1427.44                       | 57.74                                 |
| 3                   | -0.04                          | -0.52                 | -0.52                 | 1436.85                       | 58.38                                 |
| 4                   | -0.04                          | -0.55                 | -0.45                 | 1421.79                       | 57.74                                 |
| 5                   | 0.20                           | -0.70                 | -0.53                 | 1388.53                       | 55.36                                 |
| 6                   | -0.04                          | -0.59                 | -0.51                 | 1362.46                       | 54.07                                 |
| 7                   | -0.04                          | -0.51                 | -0.45                 | 1421.40                       | 57.74                                 |
| 8                   | -0.04                          | -0.42                 | -0.50                 | 1365.96                       | 52.76                                 |
| 9                   | -0.04                          | -0.55                 | -0.46                 | 1366.94                       | 55.91                                 |
| 10                  | -0.06                          | -0.54                 | -0.44                 | 1354.56                       | 54.73                                 |
| 11                  | -0.07                          | -0.71                 | -0.27                 | 1474.13                       | 62.53                                 |
| 12                  | -0.04                          | -0.54                 | -0.57                 | 1382.26                       | 55.91                                 |
| 13                  | -0.07                          | -0.53                 | -0.47                 | 1398.68                       | 56.66                                 |
| 14                  | -0.04                          | -0.53                 | -0.51                 | 1298.70                       | 51.56                                 |
| 15                  | -0.04                          | -0.52                 | -0.52                 | 1342.81                       | 53.40                                 |
| 16                  | -0.04                          | -0.35                 | -0.43                 | 1301.86                       | 51.56                                 |
| 17                  | -0.04                          | -0.57                 | -0.56                 | 1404.80                       | 53.40                                 |
| 18                  | -0.04                          | -0.51                 | -0.46                 | 1321.06                       | 52.76                                 |
| 19                  | -0.08                          | -0.38                 | -0.20                 | 1453.44                       | 62.86                                 |
| 20                  | -0.05                          | -0.55                 | -0.31                 | 1413.86                       | 57.82                                 |
| 21                  | -0.07                          | -0.53                 | -0.47                 | 1398.07                       | 56.66                                 |
| 22                  | 0.17                           | -0.68                 | -0.58                 | 1411.68                       | 57.29                                 |
| 23                  | -0.06                          | -0.51                 | -0.60                 | 1465.41                       | 59.13                                 |
| 24                  | 0.21                           | -0.74                 | -0.52                 | 1416.95                       | 55.91                                 |
| 25                  | -0.05                          | -0.50                 | -0.53                 | 1427.55                       | 57.74                                 |
| 26                  | -0.04                          | -0.53                 | -0.52                 | 1327.97                       | 52.76                                 |
| 27                  | -0.04                          | -0.56                 | -0.48                 | 1340.68                       | 53.44                                 |
| 28                  | -0.04                          | -0.51                 | -0.47                 | 1429.05                       | 58.46                                 |
| 29                  | -0.05                          | -0.46                 | -0.51                 | 1382.38                       | 57.83                                 |
| 30                  | -0.05                          | -0.86                 | -0.46                 | 1185.77                       | 46.62                                 |
| 31                  | -0.07                          | -0.91                 | -0.42                 | 1201.97                       | 48.45                                 |
| 32                  | -0.04                          | -0.86                 | -0.57                 | 1042.74                       | 38.87                                 |
| 33                  | -0.03                          | -0.63                 | -0.37                 | 1079.81                       | 40.89                                 |
| 34                  | -0.04                          | -0.97                 | -0.20                 | 944.67                        | 39.41                                 |

Table S1. Cont.

| Compound            | $E_{\text{LUMO}}$ (a.u.) | $QR^2$ | $QR^4$ | Volume ( $\text{\AA}^3$ ) | Polarizability ( $\text{\AA}^3$ ) |
|---------------------|--------------------------|--------|--------|---------------------------|-----------------------------------|
| <i>Training set</i> |                          |        |        |                           |                                   |
| 35                  | −0.04                    | −0.87  | −0.44  | 1069.62                   | 41.26                             |
| 36                  | −0.07                    | −0.88  | −0.41  | 1067.54                   | 42.43                             |
| 37                  | −0.04                    | −0.86  | −0.56  | 1038.91                   | 40.07                             |
| 38                  | −0.02                    | −0.97  | −0.52  | 984.52                    | 37.67                             |
| 39                  | −0.03                    | −0.81  | −0.35  | 989.99                    | 36.25                             |
| 40                  | −0.04                    | −0.57  | −0.32  | 985.22                    | 36.16                             |
| 41                  | −0.04                    | −0.86  | −0.51  | 1303.37                   | 50.29                             |
| 42                  | −0.06                    | −0.94  | −0.41  | 733.28                    | 27.92                             |
| 43                  | −0.03                    | −0.68  | −0.33  | 1022.22                   | 36.73                             |
| 44                  | −0.04                    | −0.90  | −0.17  | 1063.16                   | 40.30                             |
| 45                  | −0.05                    | −0.94  | −0.43  | 1008.78                   | 39.58                             |
| 46                  | −0.04                    | −0.87  | −0.47  | 972.85                    | 36.96                             |
| 47                  | −0.04                    | −0.90  | −0.17  | 873.86                    | 32.15                             |
| 48                  | −0.06                    | −0.88  | −0.54  | 950.52                    | 35.90                             |
| 49                  | −0.02                    | −0.83  | −0.27  | 771.80                    | 26.50                             |
| <i>Test set</i>     |                          |        |        |                           |                                   |
| 50                  | −0.04                    | −0.68  | −0.49  | 1549.31                   | 62.05                             |
| 51                  | −0.07                    | −0.48  | −0.52  | 1516.73                   | 59.58                             |
| 52                  | −0.04                    | −0.49  | −0.49  | 1493.03                   | 58.94                             |
| 53                  | −0.05                    | −0.45  | −0.52  | 1539.07                   | 61.50                             |
| 54                  | −0.05                    | −0.47  | −0.52  | 1394.89                   | 55.91                             |
| 55                  | 0.21                     | −0.76  | −0.53  | 1394.45                   | 55.27                             |
| 56                  | 0.21                     | −0.66  | −0.60  | 1467.98                   | 59.03                             |
| 57                  | −0.05                    | −0.48  | −0.54  | 1403.44                   | 56.56                             |
| 58                  | −0.04                    | −0.53  | −0.33  | 1082.42                   | 41.88                             |
| 59                  | −0.04                    | −0.87  | −0.48  | 1053.74                   | 39.43                             |
| 60                  | −0.06                    | −0.90  | −0.50  | 1134.25                   | 46.27                             |
| 61                  | −0.03                    | −0.87  | −0.56  | 1050.11                   | 40.07                             |
| 62                  | −0.03                    | −0.88  | −0.47  | 997.36                    | 37.59                             |
| 63                  | −0.06                    | −0.87  | −0.59  | 938.91                    | 36.48                             |

© 2014 by the authors; licensee MDPI, Basel, Switzerland. This article is an open access article distributed under the terms and conditions of the Creative Commons Attribution license (<http://creativecommons.org/licenses/by/3.0/>).
